# Supplementary material
Source: Research Square preprint supplement (doi:10.21203/rs.3.rs-9246974/v1)
Supplement: Supplementary file 2 [file a7785c51259924cf1a7d8b55.xlsx]

## Sheet: Hoja 1
Species	Date	Flower number	Temperature	Apis mellifera	Bombus funebris	Bombus robustus	Exomalopsis bruesi	Antophora pilifrons	Xylocopa viridigastra	Coelioxys	Megachile	Agapostemon nasutus	Dialictus	Caenohalictus	Neocorynura michereni	Caupolicana niveofasciata	Colletes	Vespidae	Conopidae	Syrphidae	Tachinidae	Tephritidae	Tabanidae	Hesperidae	Lycaenidae	Chrysomelidae	Abundance	Richness	Bee Abundance	Bee richness
Bidens andicola	2025-05-22	135	17	6	0	0	0	0	0	0	0	0	1	0	1	1	0	0	0	6	0	0	0	1	0	0	16	6	9	4
Bidens andicola	2025-05-25	22	16	0	0	0	0	0	0	0	0	0	0	0	0	0	0	0	0	6	2	0	0	0	0	0	8	2	0	0
Bidens andicola	2025-05-31	85	16	1	0	0	0	0	0	0	0	2	0	1	0	0	0	0	0	10	0	0	1	0	0	0	15	5	4	3
Bidens andicola	2025-06-04	60	17	2	0	0	0	0	0	0	0	0	0	2	1	0	0	0	0	5	1	0	0	0	0	0	11	5	5	3
Bidens andicola	2025-06-07	145	18	3	0	0	0	0	0	0	0	0	0	2	1	0	0	0	0	14	1	0	0	0	0	0	21	5	6	3
Bidens andicola	2025-06-15	75	17	0	0	0	0	0	0	0	0	0	0	0	0	0	0	0	0	15	5	0	0	2	0	0	22	3	0	0
Bidens andicola	2025-06-18	54	17	1	0	0	0	0	0	0	1	2	0	4	0	0	1	0	0	16	1	0	0	0	0	0	26	7	9	5
Bidens andicola	2025-06-22	72	20	0	0	0	0	0	0	0	0	0	1	0	0	0	0	0	0	6	2	0	0	0	0	0	9	3	1	1
Bidens andicola	2025-06-29	52	18	0	0	0	0	0	0	0	1	0	0	0	0	0	0	0	0	6	5	0	0	1	0	0	13	4	1	1
Bidens andicola	2025-07-04	42	15	0	0	0	0	0	0	0	1	1	0	0	0	0	1	0	0	7	2	0	0	0	0	0	12	5	3	3
Bidens andicola	2025-07-08	48	17	1	0	0	0	0	0	0	1	0	0	1	3	0	0	0	0	11	1	0	0	2	0	0	20	7	6	4
Bidens andicola	2025-07-13	56	17	0	0	0	0	0	0	0	0	0	0	0	2	0	2	0	0	3	5	0	0	1	0	0	13	5	4	2
Bidens andicola	2025-07-15	115	16	3	0	0	0	0	0	0	1	0	0	2	0	0	0	0	0	15	1	1	0	0	0	0	23	6	6	3
Bidens andicola	2025-07-18	69	18	2	0	0	0	0	0	0	1	0	0	0	0	0	0	0	0	5	2	0	0	2	0	0	12	5	3	2
Bidens andicola	2025-07-22	0	19	0	0	0	0	0	0	0	0	0	0	0	0	0	0	0	0	0	0	0	0	0	0	0	0	0	0	0
Bidens andicola	2025-07-28	0	16	0	0	0	0	0	0	0	0	0	0	0	0	0	0	0	0	0	0	0	0	0	0	0	0	0	0	0
Bidens andicola	2025-07-31	0	17	0	0	0	0	0	0	0	0	0	0	0	0	0	0	0	0	0	0	0	0	0	0	0	0	0	0	0
Bidens andicola	2025-08-04	0	18	0	0	0	0	0	0	0	0	0	0	0	0	0	0	0	0	0	0	0	0	0	0	0	0	0	0	0
Bidens andicola	2025-08-10	0	20	0	0	0	0	0	0	0	0	0	0	0	0	0	0	0	0	0	0	0	0	0	0	0	0	0	0	0
Bidens andicola	2025-08-12	0	18	0	0	0	0	0	0	0	0	0	0	0	0	0	0	0	0	0	0	0	0	0	0	0	0	0	0	0
Dalea coerulea	2025-05-22	64	16	0	0	8	0	0	10	0	0	0	1	4	0	0	0	0	0	5	0	0	0	0	0	0	28	5	23	4
Dalea coerulea	2025-05-25	80	21	0	0	1	0	0	5	0	6	0	0	1	0	0	0	0	0	0	1	0	0	0	0	0	14	5	13	4
Dalea coerulea	2025-05-31	68	17	0	0	4	0	0	1	0	8	0	1	6	0	0	0	0	0	0	0	0	0	1	0	0	21	6	20	5
Dalea coerulea	2025-06-04	85	16	0	0	1	0	0	2	0	2	0	2	0	0	0	0	0	0	7	1	0	0	0	0	0	15	6	7	4
Dalea coerulea	2025-06-07	90	16	1	0	4	0	0	1	0	4	0	1	0	0	0	0	0	0	4	1	0	0	0	0	0	16	7	11	5
Dalea coerulea	2025-06-15	66	17	0	0	1	0	0	0	0	5	0	0	1	0	0	0	2	0	0	1	0	0	0	0	0	10	5	7	3
Dalea coerulea	2025-06-18	52	17	0	1	2	0	0	3	0	9	0	0	2	0	0	1	1	0	3	0	0	0	0	0	0	22	8	18	6
Dalea coerulea	2025-06-22	83	19	0	0	4	0	0	0	0	6	0	4	2	0	0	1	0	0	0	0	0	0	0	0	0	17	5	17	5
Dalea coerulea	2025-06-29	42	15	0	1	4	0	1	0	2	3	0	2	6	0	0	0	2	0	0	0	0	0	3	0	0	24	9	19	7
Dalea coerulea	2025-07-04	35	15	0	0	0	0	0	0	0	5	0	0	0	0	0	0	0	0	2	1	0	0	1	0	0	9	4	5	1
Dalea coerulea	2025-07-08	56	16	0	0	1	0	0	0	0	5	0	0	7	0	0	0	0	1	0	0	0	0	0	0	0	14	4	13	3
Dalea coerulea	2025-07-13	59	17	0	1	3	0	0	0	1	5	0	0	6	0	0	1	0	0	0	0	0	0	1	0	0	18	7	17	6
Dalea coerulea	2025-07-15	60	17	0	0	7	0	0	0	0	4	0	0	5	0	0	1	2	0	1	0	0	0	1	7	0	28	8	17	4
Dalea coerulea	2025-07-18	67	17	0	0	2	0	0	1	0	8	0	0	0	0	0	0	0	0	5	0	0	0	0	2	0	18	5	11	3
Dalea coerulea	2025-07-22	42	19	1	1	5	0	0	0	0	6	0	0	0	0	0	1	0	0	0	0	0	0	0	1	0	15	6	14	5
Dalea coerulea	2025-07-28	37	16	1	0	4	0	0	0	0	7	0	0	3	0	0	0	0	0	4	0	0	0	0	0	0	19	5	15	4
Dalea coerulea	2025-07-31	95	17	0	0	1	0	0	12	0	1	0	2	9	0	0	0	1	1	7	0	0	0	0	0	0	34	8	25	5
Dalea coerulea	2025-08-04	56	18	0	0	2	0	1	0	0	3	0	0	0	0	0	0	0	0	0	0	0	0	0	2	0	8	4	6	3
Dalea coerulea	2025-08-10	42	20	0	1	3	0	0	0	1	3	0	0	1	0	0	0	0	0	0	0	0	0	0	4	0	13	6	9	5
Dalea coerulea	2025-08-12	58	18	0	0	4	0	0	2	0	9	0	0	1	0	0	0	0	0	2	0	0	0	0	0	0	18	5	16	4
Hypochaeris radicata	2025-05-22	59	18	5	0	0	0	0	0	0	0	0	4	0	0	0	0	0	0	9	0	0	0	0	0	0	18	3	9	2
Hypochaeris radicata	2025-05-25	145	17	4	0	0	0	0	0	0	0	0	2	0	0	0	0	0	0	5	0	0	0	0	0	0	11	3	6	2
Hypochaeris radicata	2025-05-31	22	17	0	0	0	0	0	0	0	0	0	1	0	1	0	0	0	0	8	1	0	0	0	0	0	11	4	2	2
Hypochaeris radicata	2025-06-04	150	18	3	0	0	0	0	0	0	0	0	2	0	0	0	0	0	0	6	1	0	0	0	0	0	12	4	5	2
Hypochaeris radicata	2025-06-07	67	17	9	0	0	0	0	0	0	0	0	0	0	0	0	0	0	0	0	1	0	0	0	0	0	10	2	9	1
Hypochaeris radicata	2025-06-15	42	17	4	0	0	0	0	0	0	0	0	1	0	0	0	0	0	0	7	0	0	0	0	0	0	12	3	5	2
Hypochaeris radicata	2025-06-18	32	20	2	0	0	0	0	0	0	0	0	0	0	0	0	0	0	0	0	0	0	0	0	0	0	2	1	2	1
Hypochaeris radicata	2025-06-22	45	18	3	0	0	0	0	0	0	0	0	0	0	0	0	0	0	0	3	0	0	0	0	0	0	6	2	3	1
Hypochaeris radicata	2025-06-29	29	18	0	0	0	0	0	0	0	0	0	1	0	0	0	0	0	0	4	0	0	0	4	0	0	9	3	1	1
Hypochaeris radicata	2025-07-04	36	19	4	0	0	0	0	0	0	0	0	0	0	0	0	0	0	0	6	0	0	0	0	0	0	10	2	4	1
Hypochaeris radicata	2025-07-08	31	17	3	0	0	0	0	0	0	0	0	0	1	0	0	0	0	0	5	0	0	0	0	0	0	9	3	4	2
Hypochaeris radicata	2025-07-13	0	17	0	0	0	0	0	0	0	0	0	0	0	0	0	0	0	0	0	0	0	0	0	0	0	0	0	0	0
Hypochaeris radicata	2025-07-15	0	17	0	0	0	0	0	0	0	0	0	0	0	0	0	0	0	0	0	0	0	0	0	0	0	0	0	0	0
Hypochaeris radicata	2025-07-18	0	17	0	0	0	0	0	0	0	0	0	0	0	0	0	0	0	0	0	0	0	0	0	0	0	0	0	0	0
Hypochaeris radicata	2025-07-22	0	19	0	0	0	0	0	0	0	0	0	0	0	0	0	0	0	0	0	0	0	0	0	0	0	0	0	0	0
Hypochaeris radicata	2025-07-28	0	16	0	0	0	0	0	0	0	0	0	0	0	0	0	0	0	0	0	0	0	0	0	0	0	0	0	0	0
Hypochaeris radicata	2025-07-31	0	17	0	0	0	0	0	0	0	0	0	0	0	0	0	0	0	0	0	0	0	0	0	0	0	0	0	0	0
Hypochaeris radicata	2025-08-04	0	18	0	0	0	0	0	0	0	0	0	0	0	0	0	0	0	0	0	0	0	0	0	0	0	0	0	0	0
Hypochaeris radicata	2025-08-10	0	20	0	0	0	0	0	0	0	0	0	0	0	0	0	0	0	0	0	0	0	0	0	0	0	0	0	0	0
Hypochaeris radicata	2025-08-12	0	18	0	0	0	0	0	0	0	0	0	0	0	0	0	0	0	0	0	0	0	0	0	0	0	0	0	0	0
Lupinus pubescens	2025-05-22	39	17	0	0	0	0	0	0	0	0	0	0	0	0	0	0	0	0	2	1	0	0	0	1	22	26	4	0	0
Lupinus pubescens	2025-05-25	12	18	0	0	0	0	0	0	0	2	0	0	0	0	0	0	0	0	0	0	0	0	0	1	0	3	2	2	1
Lupinus pubescens	2025-05-31	16	16	0	0	0	0	0	0	0	1	0	0	0	0	0	0	0	0	1	0	0	0	0	0	6	8	3	1	1
Lupinus pubescens	2025-06-04	11	19	0	0	0	0	0	0	0	2	0	0	0	0	0	0	0	0	1	0	0	0	0	0	0	3	2	2	1
Lupinus pubescens	2025-06-07	10	16	0	0	0	0	0	1	9	1	0	0	0	0	0	0	0	0	2	0	0	0	0	0	5	18	5	11	3
Lupinus pubescens	2025-06-15	14	17	0	0	0	0	0	0	0	1	0	0	0	0	0	0	0	0	0	1	0	0	0	0	14	16	3	1	1
Lupinus pubescens	2025-06-18	16	19	0	0	1	0	0	0	0	3	0	0	0	0	0	0	0	0	0	0	0	0	0	3	0	7	3	4	2
Lupinus pubescens	2025-06-22	24	19	0	0	0	0	0	0	0	3	0	0	0	0	0	0	0	0	0	0	0	0	0	1	0	4	2	3	1
Lupinus pubescens	2025-06-29	18	19	0	0	0	0	0	0	0	6	0	0	0	0	0	0	0	0	0	0	0	0	0	0	0	6	1	6	1
Lupinus pubescens	2025-07-04	18	18	0	0	0	0	0	0	0	3	0	0	0	0	0	0	0	0	0	0	0	0	0	0	0	3	1	3	1
Lupinus pubescens	2025-07-08	16	19	0	0	0	0	0	0	1	2	0	0	0	0	0	0	0	0	0	0	0	0	0	1	0	4	3	3	2
Lupinus pubescens	2025-07-13	21	17	0	0	1	0	0	0	0	3	0	0	0	0	0	0	0	0	0	0	0	0	0	1	0	5	3	4	2
Lupinus pubescens	2025-07-15	0	17	0	0	0	0	0	0	0	0	0	0	0	0	0	0	0	0	0	0	0	0	0	0	0	0	0	0	0
Lupinus pubescens	2025-07-18	0	17	0	0	0	0	0	0	0	0	0	0	0	0	0	0	0	0	0	0	0	0	0	0	0	0	0	0	0
Lupinus pubescens	2025-07-22	0	19	0	0	0	0	0	0	0	0	0	0	0	0	0	0	0	0	0	0	0	0	0	0	0	0	0	0	0
Lupinus pubescens	2025-07-28	0	16	0	0	0	0	0	0	0	0	0	0	0	0	0	0	0	0	0	0	0	0	0	0	0	0	0	0	0
Lupinus pubescens	2025-07-31	0	17	0	0	0	0	0	0	0	0	0	0	0	0	0	0	0	0	0	0	0	0	0	0	0	0	0	0	0
Lupinus pubescens	2025-08-04	0	18	0	0	0	0	0	0	0	0	0	0	0	0	0	0	0	0	0	0	0	0	0	0	0	0	0	0	0
Lupinus pubescens	2025-08-10	0	20	0	0	0	0	0	0	0	0	0	0	0	0	0	0	0	0	0	0	0	0	0	0	0	0	0	0	0
Lupinus pubescens	2025-08-12	0	18	0	0	0	0	0	0	0	0	0	0	0	0	0	0	0	0	0	0	0	0	0	0	0	0	0	0	0
Salvia pauciserrata	2025-05-22	10	18	0	0	0	0	0	6	0	0	0	0	0	0	0	0	0	0	0	0	0	0	0	0	0	6	1	6	1
Salvia pauciserrata	2025-05-25	12	17	0	0	1	0	0	1	0	0	0	0	1	0	0	0	0	0	0	0	0	0	0	0	0	3	3	3	3
Salvia pauciserrata	2025-05-31	9	17	0	0	0	0	0	4	0	0	0	0	1	0	0	0	0	0	0	0	0	0	0	0	0	5	2	5	2
Salvia pauciserrata	2025-06-04	10	17	0	0	2	0	0	1	0	0	0	0	0	0	0	0	0	0	0	0	0	0	0	0	0	3	2	3	2
Salvia pauciserrata	2025-06-07	6	19	0	0	1	0	0	0	0	0	0	0	3	0	0	0	0	0	0	0	0	0	0	0	0	4	2	4	2
Salvia pauciserrata	2025-06-15	18	17	0	0	0	0	0	1	0	0	0	0	0	0	0	0	0	0	0	0	0	0	0	0	0	1	1	1	1
Salvia pauciserrata	2025-06-18	23	18	0	0	0	0	0	9	0	0	0	0	0	0	0	0	0	0	0	0	0	0	0	0	0	9	1	9	1
Salvia pauciserrata	2025-06-22	11	17	0	0	1	0	0	4	0	0	0	0	0	0	0	0	0	0	0	0	0	0	0	0	0	5	2	5	2
Salvia pauciserrata	2025-06-29	9	18	0	0	0	0	0	0	0	0	0	0	2	0	0	0	0	0	0	0	0	0	0	0	0	2	1	2	1
Salvia pauciserrata	2025-07-04	5	19	0	0	1	0	0	0	0	0	0	0	1	0	0	0	0	0	0	0	0	0	0	0	0	2	2	2	2
Salvia pauciserrata	2025-07-08	0	19	0	0	0	0	0	0	0	0	0	0	0	0	0	0	0	0	0	0	0	0	0	0	0	0	0	0	0
Salvia pauciserrata	2025-07-13	0	17	0	0	0	0	0	0	0	0	0	0	0	0	0	0	0	0	0	0	0	0	0	0	0	0	0	0	0
Salvia pauciserrata	2025-07-15	0	17	0	0	0	0	0	0	0	0	0	0	0	0	0	0	0	0	0	0	0	0	0	0	0	0	0	0	0
Salvia pauciserrata	2025-07-18	0	17	0	0	0	0	0	0	0	0	0	0	0	0	0	0	0	0	0	0	0	0	0	0	0	0	0	0	0
Salvia pauciserrata	2025-07-22	0	19	0	0	0	0	0	0	0	0	0	0	0	0	0	0	0	0	0	0	0	0	0	0	0	0	0	0	0
Salvia pauciserrata	2025-07-28	0	16	0	0	0	0	0	0	0	0	0	0	0	0	0	0	0	0	0	0	0	0	0	0	0	0	0	0	0
Salvia pauciserrata	2025-07-31	0	17	0	0	0	0	0	0	0	0	0	0	0	0	0	0	0	0	0	0	0	0	0	0	0	0	0	0	0
Salvia pauciserrata	2025-08-04	0	18	0	0	0	0	0	0	0	0	0	0	0	0	0	0	0	0	0	0	0	0	0	0	0	0	0	0	0
Salvia pauciserrata	2025-08-10	0	20	0	0	0	0	0	0	0	0	0	0	0	0	0	0	0	0	0	0	0	0	0	0	0	0	0	0	0
Salvia pauciserrata	2025-08-12	0	18	0	0	0	0	0	0	0	0	0	0	0	0	0	0	0	0	0	0	0	0	0	0	0	0	0	0	0
Trifolium repens	2025-05-22	82	18	7	0	0	0	0	0	0	0	0	0	0	1	0	0	0	0	1	0	0	0	0	0	0	9	3	8	2
Trifolium repens	2025-05-25	74	17	3	0	0	0	0	0	0	0	0	0	0	0	0	0	0	0	0	0	0	0	0	0	0	3	1	3	1
Trifolium repens	2025-05-31	57	17	3	0	0	0	0	0	0	0	0	0	0	1	0	0	0	0	1	0	0	0	0	0	0	5	3	4	2
Trifolium repens	2025-06-04	75	17	8	0	0	0	0	0	0	0	0	0	0	0	0	0	0	0	0	1	0	0	0	0	0	9	2	8	1
Trifolium repens	2025-06-07	75	17	7	0	0	0	0	0	0	0	0	0	0	0	0	0	0	0	1	0	0	0	0	0	0	8	2	7	1
Trifolium repens	2025-06-15	72	18	8	0	0	0	0	0	0	0	0	0	0	0	0	0	0	0	1	0	0	0	0	0	0	9	2	8	1
Trifolium repens	2025-06-18	75	17	8	0	0	0	0	0	0	0	0	0	0	0	0	0	0	0	0	0	0	0	0	0	0	8	1	8	1
Trifolium repens	2025-06-22	68	17	7	0	0	0	0	0	0	0	0	0	0	0	0	0	0	0	2	0	0	0	0	0	0	9	2	7	1
Trifolium repens	2025-06-29	55	18	6	0	0	0	0	0	0	0	0	0	0	0	0	0	0	0	1	1	0	0	0	0	0	8	3	6	1
Trifolium repens	2025-07-04	70	17	6	0	0	0	0	0	0	0	0	0	0	0	0	0	0	0	1	0	0	0	0	0	0	7	2	6	1
Trifolium repens	2025-07-08	82	19	11	0	0	0	0	0	0	0	0	0	0	0	0	0	0	0	0	0	0	0	0	0	0	11	1	11	1
Trifolium repens	2025-07-13	135	18	5	0	0	0	0	0	0	0	0	0	0	0	0	0	0	0	1	0	0	0	0	0	0	6	2	5	1
Trifolium repens	2025-07-15	32	17	1	0	0	1	0	0	0	0	0	0	1	0	0	0	0	0	0	0	0	0	0	0	0	3	3	3	3
Trifolium repens	2025-07-18	0	17	0	0	0	0	0	0	0	0	0	0	0	0	0	0	0	0	0	0	0	0	0	0	0	0	0	0	0
Trifolium repens	2025-07-22	0	19	0	0	0	0	0	0	0	0	0	0	0	0	0	0	0	0	0	0	0	0	0	0	0	0	0	0	0
Trifolium repens	2025-07-28	0	16	0	0	0	0	0	0	0	0	0	0	0	0	0	0	0	0	0	0	0	0	0	0	0	0	0	0	0
Trifolium repens	2025-07-31	0	17	0	0	0	0	0	0	0	0	0	0	0	0	0	0	0	0	0	0	0	0	0	0	0	0	0	0	0
Trifolium repens	2025-08-04	0	18	0	0	0	0	0	0	0	0	0	0	0	0	0	0	0	0	0	0	0	0	0	0	0	0	0	0	0
Trifolium repens	2025-08-10	0	20	0	0	0	0	0	0	0	0	0	0	0	0	0	0	0	0	0	0	0	0	0	0	0	0	0	0	0
Trifolium repens	2025-08-12	0	18	0	0	0	0	0	0	0	0	0	0	0	0	0	0	0	0	0	0	0	0	0	0	0	0	0	0	0
